# Supplementary material for: A non-planar pentaphenylbenzene functionalized benzo[2,1,3]thiadiazole derivative as a novel red molecular emitter for non-doped organic light-emitting diodes
Source: Royal Society of Chemistry journal article supplement (doi:10.1039/b719390d), 2008-01-01
Supplement: b719390d.pdf [file b719390d.pdf]

## Supporting Information

# Non-planar Pentaphenylbenzene Functionalized Benzo[2,1,3]thiadiazole Derivative as Novel Red Molecular Emitter for Non-doped Organic Light- Emitting Diodes

Xiaobo Sun, Xinjun Xu, Wenfeng Qiu, Gui Yu, Hengjun Zhang, Xike Gao, Shiyao Chen,  
Yanlin Song, and Yunqi Liu\*

*Beijing National Laboratory for Molecular Sciences, Institute of Chemistry, Chinese  
Academy of Sciences, Beijing 100080, P. R. China*

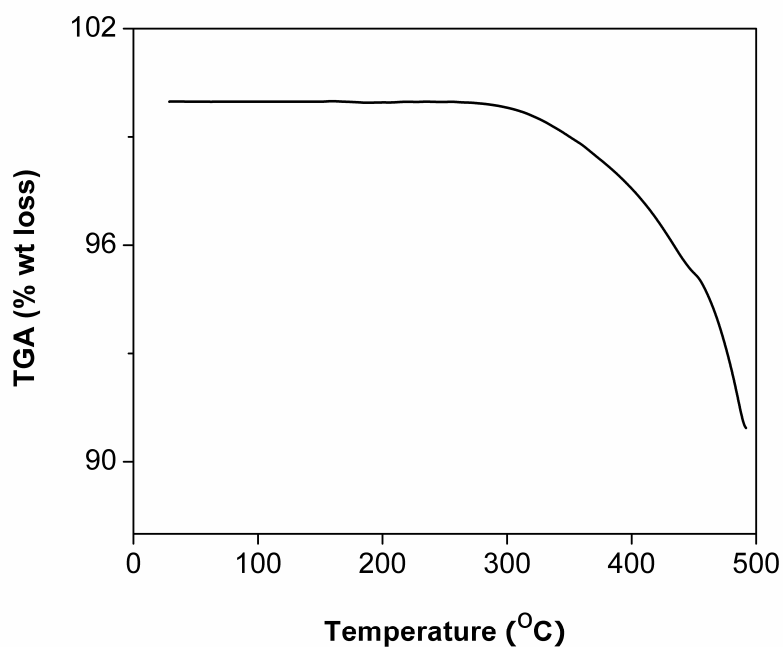

Figure 1. TGA curve of the BPTBTD powder.
